# Supplementary material
Source: publisher figshare collection journal article supplement (https://diabetesjournals.figshare.com/ndownloader/files/25043531)

## **Online-Only Supplemental Material**

### **Post-intervention Effects of Varying Treatment Arms on Glycemic Failure and Beta-Cell Function in the TODAY Study**

This document presents supplemental materials cited in the text of the main manuscript.

**Supplemental Table S1.** Primary outcome results during TODAY and TODAY2 Phase 1. Data is presented since randomization.

Supplemental1 Figure S1.

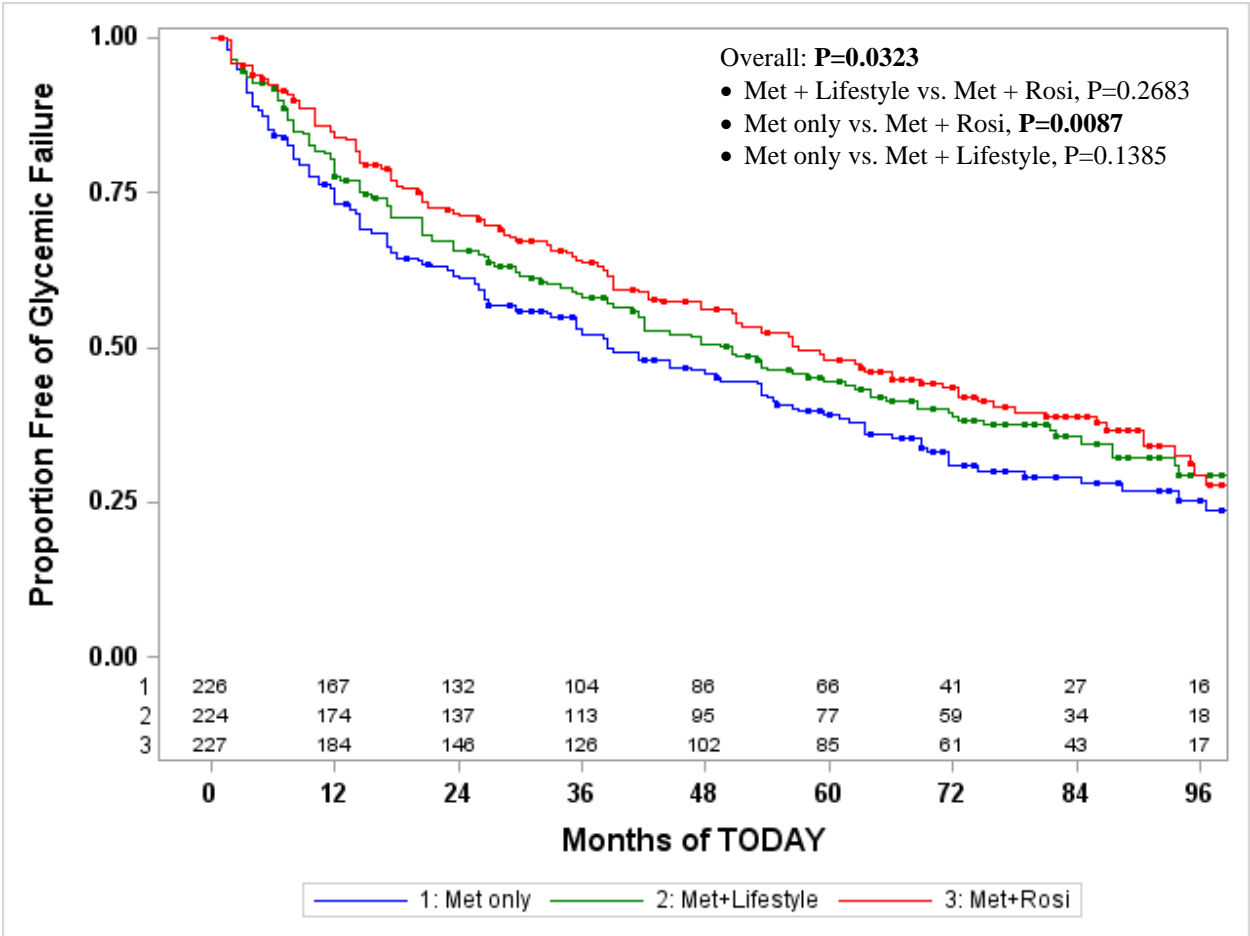

Supplement: Supplementary file 1 [file 25043531]
